# Supplementary material for: Understanding the growth and photoelectrochemical properties of mesocrystals and single crystals: a case of anatase TiO2
Source: Royal Society of Chemistry journal article supplement (doi:10.1039/c4cp00718b), 2014-01-01
Supplement: c4cp00718b1.pdf [file c4cp00718b1.pdf]

## Supporting Information

### Understanding the Growth and Photoelectrochemical Properties of Mesocrystals and Single Crystals: A Case of Anatase TiO<sub>2</sub>

Zhensheng Hong,<sup>\*a</sup> Hong Dai,<sup>b</sup> Zhigao Huang<sup>a</sup> and Mingdeng Wei<sup>\*,c</sup>

<sup>a</sup> College of Physics and Energy, Fujian Normal University, Fuzhou, Fujian 350108, China.

<sup>b</sup> College of Chemistry and Chemical Engineering, Fujian Normal University, Fuzhou, Fujian 350108, China.

<sup>c</sup> Institute of Advanced Energy Materials, Fuzhou University, Fuzhou, Fujian 350002, China.

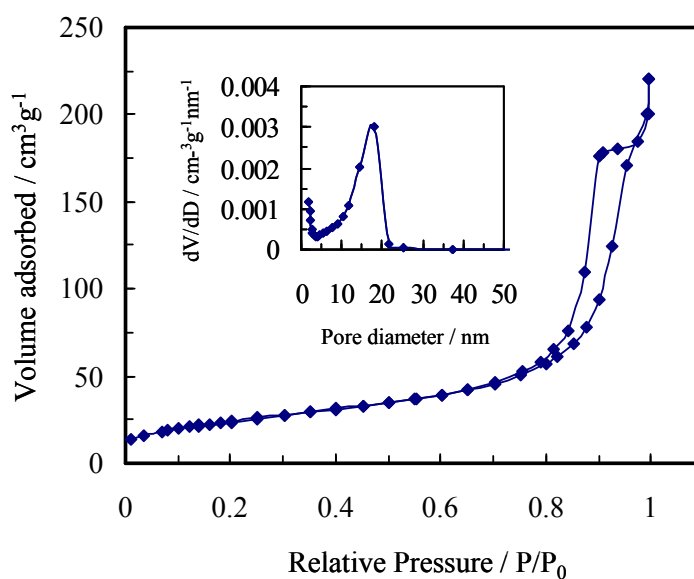

**Fig. S1** N<sub>2</sub> adsorption-desorption isotherms of the TiO<sub>2</sub> mesocrystals. The insets show the BJH pore size distribution.

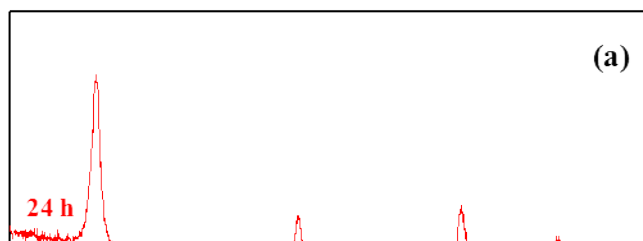

**Fig. S2** XRD patterns of the precipitates obtained at different reaction times under (a) solvothermal and (b) hydrothermal conditions. The JCPDS patterns in (a) and (b) are anatase  $\text{TiO}_2$  and  $\text{TiO}_2\text{-B}$ , respectively.

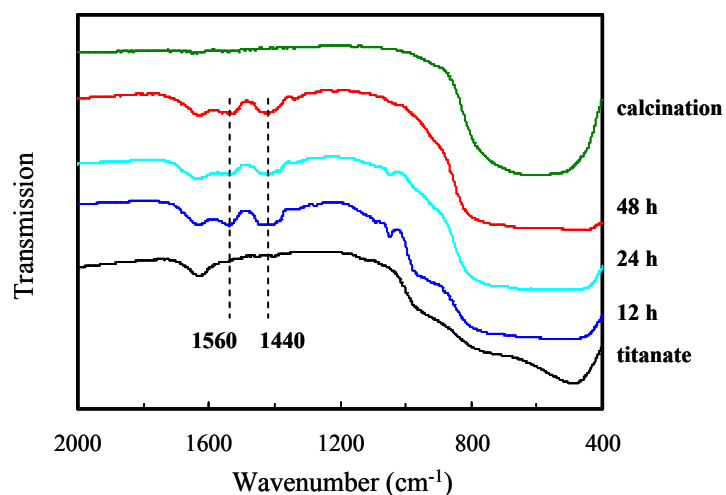

**Fig. S3** FTIR patterns of titanate precursor and the precipitates obtained at different reaction times under solvothermal conditions, as well as the precipitate obtained after 48 h of reaction and 30 min of calcination at 400 °C.

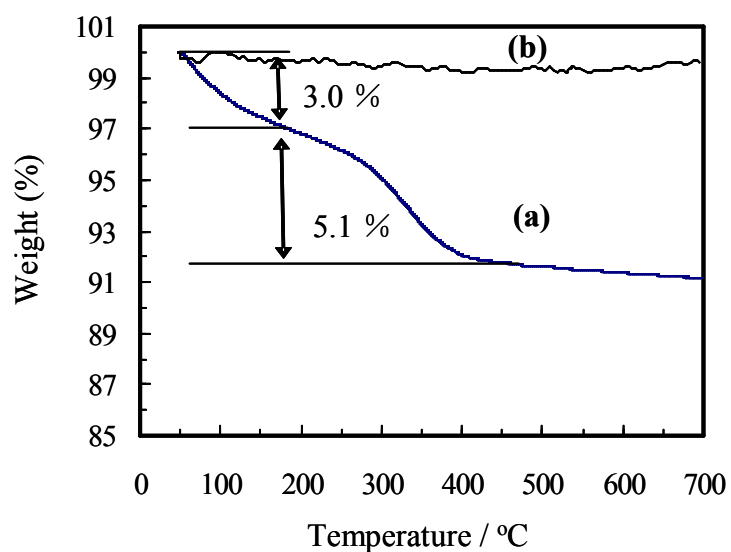

**Fig. S4** TGA curves of the as-precipitated  $\text{TiO}_2$  mesocrystals (a) and single crystals (b) synthesized at 200 °C under solvothermal and hydrothermal conditions.
